# Supplementary material for: Antimicrobial photodynamic therapy fighting polymicrobial infections – a journey from in vitro to in vivo
Source: Royal Society of Chemistry journal article supplement (doi:10.1039/d0pp00108b), 2020-09-30
Supplement: d0pp00108b1.pdf [file d0pp00108b1.pdf]

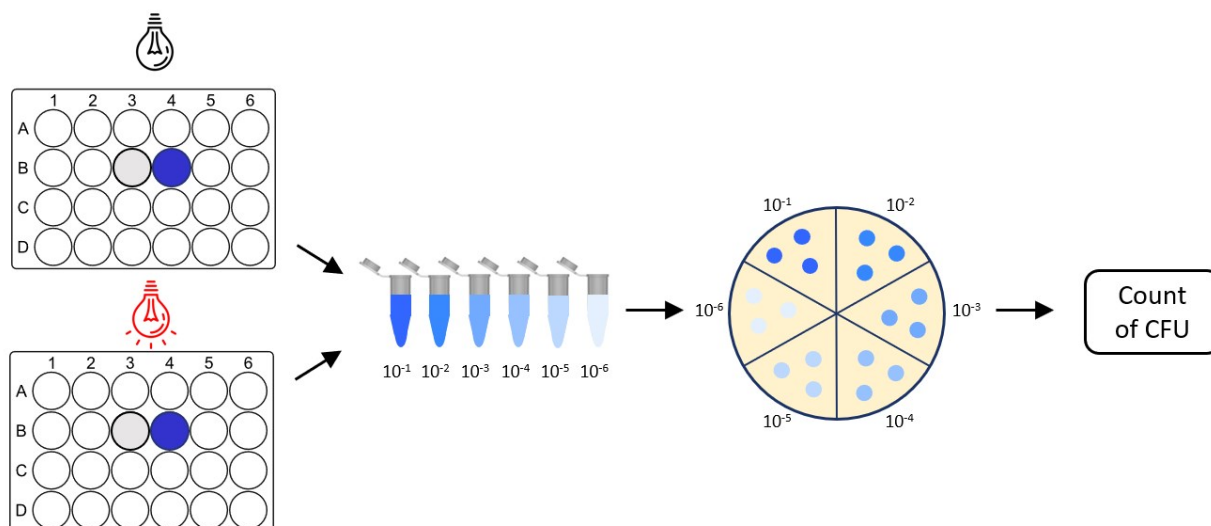

Figure S1: Scheme of the basic experimental setup of the in vitro aPDT assays on bacteria in suspension culture. 250  $\mu$ l of bacteria suspension are pipetted in four different wells of two 24-well plates. Methylene blue is added in the respective concentration to one of the wells per plate and the suspensions are incubated at 37 °C in a shaker for 20 min. The PS is activated by 10 min of pulsed red LED light irradiation and the control plate is kept in the dark for the same time period. For each well a dilution series is prepared. Three 20  $\mu$ l drops are plated per dilution for the determination of the colony forming units (CFUs) of the different treatments.
